# Supplementary material
Source: publisher site journal article supplement (https://www.dovepress.com/article/411901)
Supplement: Supplementary file 1 [file get_supplementary_file.php]

Supplementary Table 1. The qRT-PCR primers used in this study.

| **Gene** | **Forward primer (5’-3’)** | **Reverse primer(5’-3’)** |
| --- | --- | --- |
| Circ_0075146 | GCTAGATGTGCTGGACTCCTTG | CAGCGGAACTTGACGGTGTTC |
| Circ_0075147 | GTGTCTGCACCCAGGAAGAGC | GTCTTTAGGACTTGCACATAGG |
| CXCR4 | CCACGCCACCAACAGTCAGAG | CTTCTGGTGGCCCTTGGAGTG |
| GAPDH | GGGGCTCTCCAGAACATCATCC | ACGCCTGCTTCACCACCTCTT |

Supplementary Table 2. Antibody for western blotting, RIP, and immunohistochemistry.

| **Antibody** | **Company** | **Cat No.** |
| --- | --- | --- |
| CXCR4 | Abcam | ab181020 |
| Tubulin | Abcam | ab7291 |
| CD8 | Abcam | ab4055 |
| PD-L1 | Abcam | ab213480 |
| PD-1 | Abcam | ab214421 |
| HRP-labeled Goat Anti-Rabbit IgG(H+L) | Beyotime | A0208 |
| HRP-labeled Goat Anti-mouse IgG(H+L) | Beyotime | A0216 |
| AGO2 | Abcam | ab32381 |
| IgG | Abcam | ab172730 |
